# Supplementary material
Source: publisher figshare collection journal article supplement (https://acs.figshare.com/ndownloader/files/22788248)
Supplement: Supplementary file 1 [file 22788248]

# Supporting Information to Migration of Liquid Bridges at the Interface of Spheres and Plates with an Imposed Thermal Gradient

Qingwen Dai\*, Zhejun Chong, Wei Huang, and Xiaolei Wang

National Key Laboratory of Science and Technology on Helicopter Transmission,  
Nanjing University of Aeronautics & Astronautics, Nanjing 210016, China

\*Corresponding author: Qingwen Dai, daiqingwen@nuaa.edu.cn

Number of pages: 1

Number of figures: 1

Fig. S1 shows the residual liquids adhered on sphere surfaces under different materials of ① GCr15, ②  $\text{Si}_3\text{N}_4$ , and ③ PTFE; and GCr15 with different diameters of ④  $d = 10$  mm, ⑤  $d = 12$  mm, and ⑥  $d = 14$  mm, the experimental conditions are as follows: thermal gradient of  $3.64\text{ }^\circ\text{C/mm}$ , gap of  $1.5\text{ mm}$ , and viscosity of  $100\text{ mPa}\cdot\text{s}$ .

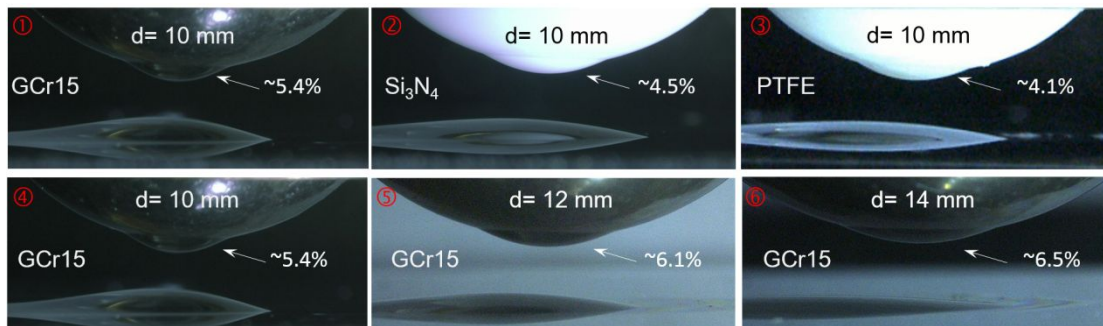

**Fig. S1** Residual liquids adhered on sphere surfaces under varying experimental conditions.
